# Supplementary material for: Structure, luminescence properties and energy transfer behavior of color-adjustable Sr3Gd2(Si3O9)2:Ce3+, Tb3+/Mn2+ phosphors
Source: Royal Society of Chemistry journal article supplement (doi:10.1039/c5ra20756h), 2015-01-01
Supplement: c5ra20756h1.pdf [file c5ra20756h1.pdf]

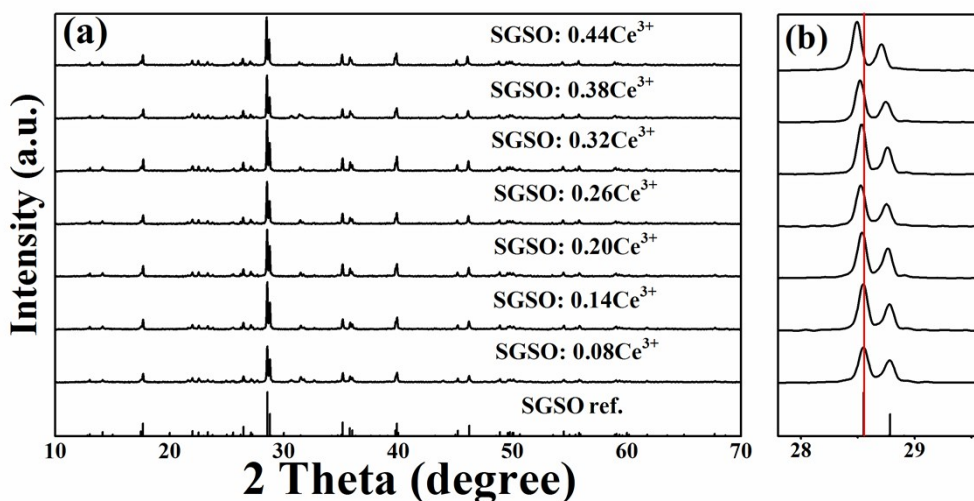

Fig. S1 (a) XRD patterns of SGSO: $x\text{Ce}^{3+}$  ( $x = 0.08, 0.14, 0.20, 0.26, 0.32, 0.38, 0.44$ ). The  $\text{Sr}_3\text{Gd}_2(\text{Si}_3\text{O}_9)_2$  phase reported by Tyutyunnik is shown as a reference.<sup>29</sup> (b) Partial enlarged details of XRD patterns of SGSO: $x\text{Ce}^{3+}$  ( $x = 0.08, 0.14, 0.20, 0.26, 0.32, 0.38, 0.44$ ).

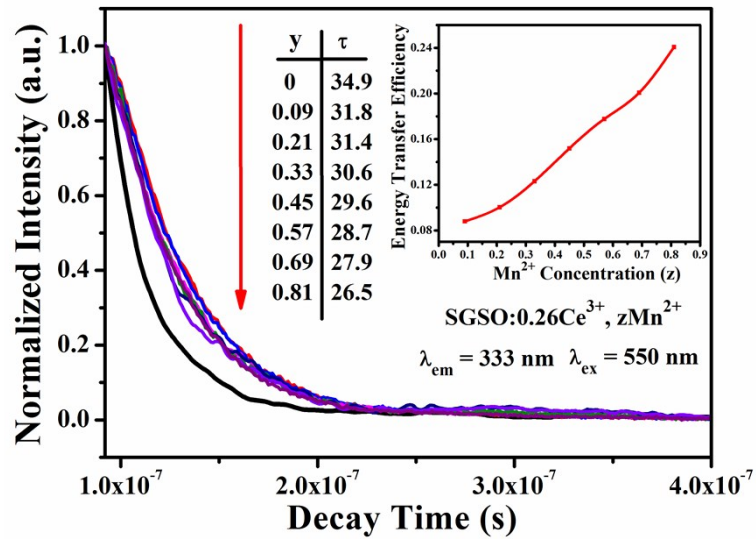

Fig. S2 Decay curves of  $\text{Ce}^{3+}$  emission monitored at 416 nm for  $\text{SGSO:0.26Ce}^{3+}, z\text{Mn}^{2+}$  ( $z = 0, 0.09, 0.21, 0.33, 0.45, 0.57, 0.69, 0.81$ ) under excitation at 348 nm. The inset shows the dependence of energy transfer efficiency ( $\eta_T$ ) on the  $\text{Mn}^{2+}$  content.

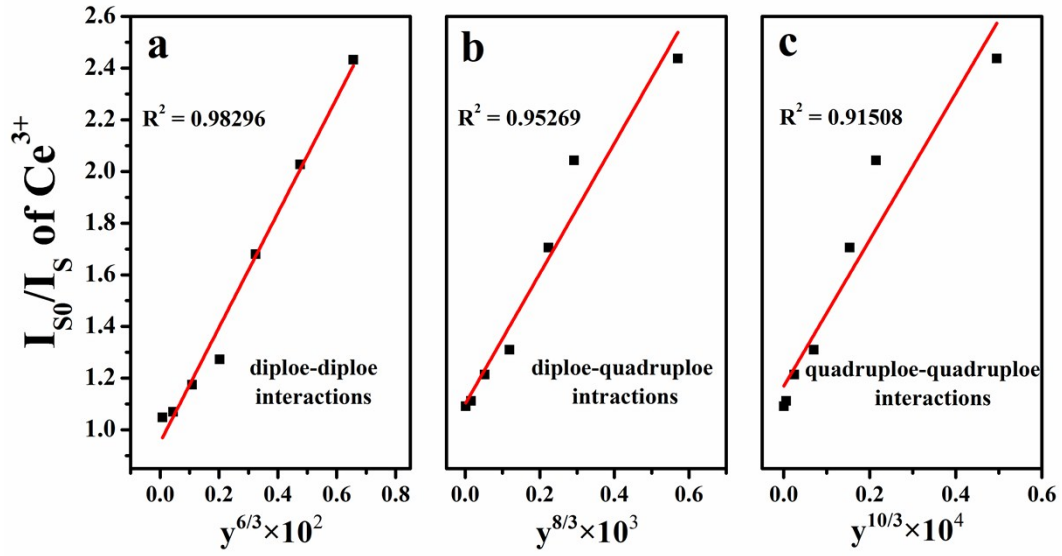

Fig. S3 Dependence of  $I_{S0}/I_S$  of  $Ce^{3+}$  in  $SGSO:0.26Ce^{3+}$ ,  $zMn^{2+}$  ( $z = 0, 0.09, 0.21, 0.33, 0.45, 0.57, 0.69, 0.81$ ) samples, (a)  $z^{6/3}$ , (b)  $z^{8/3}$  and (c)  $z^{10/3}$ .

Table S1 All atom positions, occupation probability and thermal vibration parameters of SGSO:0.26Ce<sup>3+</sup>, 0.60Tb<sup>3+</sup> sample.

| Atom | Wyckoff position | X          | Y          | Z          | Bios.    | Occ.     |
|------|------------------|------------|------------|------------|----------|----------|
| Sr1  | 8f               | 0.15966(0) | 0.12390(0) | 0.41185(0) | 1.879(0) | 0.661(0) |
| Gd1  | 8f               | 0.15966(0) | 0.12390(0) | 0.41185(0) | 1.879(0) | 0.339(0) |
| Sr2  | 8f               | 0.33893(0) | 0.12980(0) | 0.07935(0) | 2.392(0) | 0.710(0) |
| Gd2  | 8f               | 0.33893(0) | 0.12980(0) | 0.07935(0) | 2.392(0) | 0.290(0) |
| Sr3  | 4e               | 0.00000(0) | 0.37830(0) | 0.25000(0) | 2.045(0) | 0.130(0) |
| Gd3  | 4e               | 0.00000(0) | 0.37830(0) | 0.25000(0) | 2.045(0) | 0.370(0) |
| Si1  | 8f               | 0.09610(0) | 0.06830(0) | 0.10830(0) | 3.316(0) | 1.000(0) |
| Si2  | 8f               | 0.27330(0) | 0.37200(0) | 0.26540(0) | 3.395(0) | 1.000(0) |
| Si3  | 8f               | 0.40570(0) | 0.17970(0) | 0.40030(0) | 2.978(0) | 1.000(0) |
| O1   | 8f               | 0.01720(0) | 0.18320(0) | 0.13660(0) | 3.316(0) | 1.000(0) |
| O2   | 8f               | 0.05940(0) | 0.11500(0) | 0.58080(0) | 3.066(0) | 1.000(0) |
| O3   | 8f               | 0.16050(0) | 0.38200(0) | 0.29880(0) | 1.285(0) | 1.000(0) |
| O4   | 8f               | 0.17250(0) | 0.09870(0) | 0.01890(0) | 1.263(0) | 1.000(0) |
| O5   | 8f               | 0.16720(0) | 0.04250(0) | 0.18670(0) | 2.628(0) | 1.000(0) |
| O6   | 8f               | 0.30490(0) | 0.37100(0) | 0.17540(0) | 1.263(0) | 1.000(0) |
| O7   | 8f               | 0.31830(0) | 0.21590(0) | 0.31910(0) | 1.816(0) | 1.000(0) |
| O8   | 8f               | 0.34590(0) | 0.09080(0) | 0.49110(0) | 1.342(0) | 1.000(0) |
| O9   | 8f               | 0.50660(0) | 0.07760(0) | 0.13220(0) | 1.421(0) | 1.000(0) |

Table S2 Selected interatomic distances of SGSO:0.26Ce<sup>3+</sup>, 0.60Tb<sup>3+</sup> sample.

| Bond       | Length (Å) | Bond       | Length (Å) | Bond       | Length (Å) |
|------------|------------|------------|------------|------------|------------|
| Sr1-O1     | 2.56072(5) | Sr2-O3     | 2.69898(5) | Sr3-O1     | 2.32028(4) |
| Sr1-O2     | 2.86542(7) | Sr2-O4     | 2.45523(5) | Sr3-O1     | 2.32028(4) |
| Sr1-O3     | 2.67524(5) | Sr2-O4     | 2.63460(5) | Sr3-O3     | 2.30588(5) |
| Sr1-O4     | 2.40739(4) | Sr2-O5     | 2.91071(6) | Sr3-O3     | 2.30588(5) |
| Sr1-O6     | 2.45999(5) | Sr2-O6     | 2.45392(4) | Sr3-O9     | 2.38223(4) |
| Sr1-O7     | 2.66141(5) | Sr2-O8     | 2.21106(4) | Sr3-O9     | 2.38223(4) |
| Sr1-O8     | 2.81586(6) | Sr2-O9     | 2.45393(5) | Gd3-O1     | 2.32028(4) |
| Sr1-O8     | 2.71309(5) | Gd2-O3     | 2.69898(5) | Gd3-O1     | 2.32028(4) |
| Gd1-O1     | 2.56072(5) | Gd2-O4     | 2.45523(5) | Gd3-O3     | 2.30588(5) |
| Gd1-O2     | 2.86542(7) | Gd2-O4     | 2.63460(5) | Gd3-O3     | 2.30588(5) |
| Gd1-O3     | 2.67524(5) | Gd2-O5     | 2.91071(6) | Gd3-O9     | 2.38223(4) |
| Gd1-O4     | 2.40739(4) | Gd2-O6     | 2.45392(4) | Gd3-O9     | 2.38223(4) |
| Gd1-O6     | 2.45999(5) | Gd2-O8     | 2.21106(4) | —          | —          |
| Gd1-O7     | 2.66141(5) | Gd2-O9     | 2.45393(5) | —          | —          |
| Gd1-O8     | 2.81586(6) | —          | —          | —          | —          |
| Gd1-O8     | 2.71309(5) | —          | —          | —          | —          |
| Sr1/ Gd1-O | 2.64489    | Sr2/ Gd2-O | 2.54549    | Sr3/ Gd3-O | 2.33613    |

Table S3 The ionic radius (Å) of Sr<sup>2+</sup>, Gd<sup>3+</sup>, Ce<sup>3+</sup>, Tb<sup>3+</sup> and Mn<sup>2+</sup> for the given coordination number (CN).

| Ion              | Sites | Ionic Radius(Å) |      |      |
|------------------|-------|-----------------|------|------|
|                  |       | CN=8            | CN=7 | CN=6 |
| Sr <sup>2+</sup> | 8f/4e | 1.26            | 1.21 | 1.18 |
| Gd <sup>3+</sup> | 8f/4e | 1.05            | 1.00 | 0.94 |
| Ce <sup>3+</sup> | 8f/4e | 1.14            | 1.07 | 1.01 |
| Tb <sup>3+</sup> | 8f/4e | 1.04            | 0.98 | 0.92 |
| Mn <sup>2+</sup> | 8f/4e | 0.96            | 0.90 | 0.83 |
